# Supplementary material for: Microtubule Affinity-Regulating Kinase 4 Promotes Oxidative Stress and Mitochondrial Dysfunction by Activating NF-κB and Inhibiting AMPK Pathways in Porcine Placental Trophoblasts
Source: MDPI journal article supplement (doi:10.3390/biomedicines10010165), 2022-01-13
Supplement: s1 [file s1]

Figure S2

A

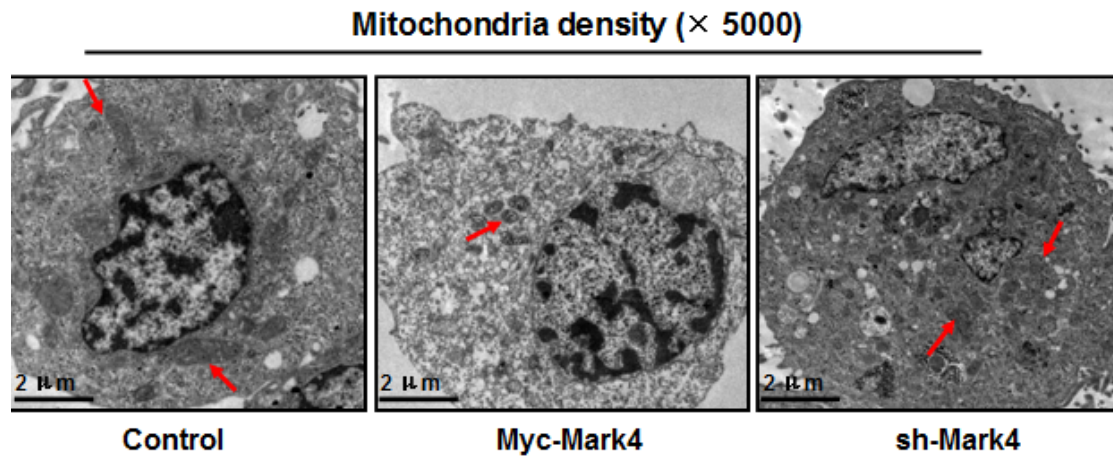

B

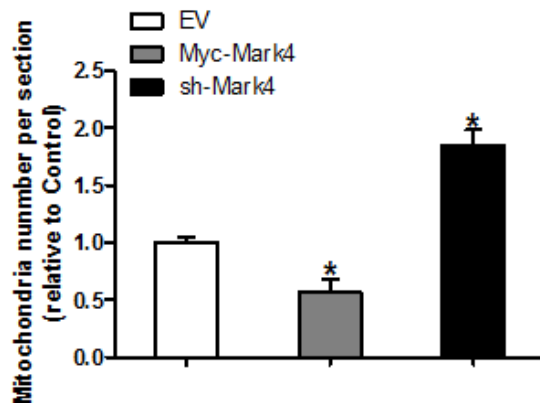

C

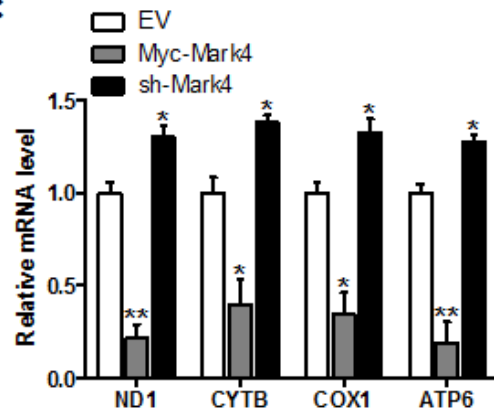

**Figure S2.** MARK4 decreases mitochondrial content in pig primary trophoblast cells challenged with 400  $\mu$ M NEFA. (a) Mitochondrial density assessed by electron microscopy in cytotrophoblasts after transfection with Myc-MARK4 and sh-MARK4 for 48h. Cells were then incubated with 400 $\mu$ M NEFA for 36h. Original magnification,  $\times 5,000$ ; (b) Quantification of mitochondrial number per image area in (a) relative to control group (analysis of 10 random images per cell section,  $n = 3$ ); (c) The relative mRNA level of various mitochondria-encoded genes was determined by quantitative RT-PCR in pig trophoblast cells ( $n = 3$ ). Results were expressed as fold change relative to the values of control cells set to 1 unit. Values are expressed as mean  $\pm$  SEM. \*\*  $P < 0.01$ ; \*  $P < 0.05$  compared with the control group. NEFA: non-esterified fatty acid; Myc-MARK4 group: over expression of MARK4 group; sh-MARK4 group: knock down of MARK4 group; Control: empty vector (EV) group; Red arrow: mitochondria.
