# Supplementary material for: Microtubule Affinity-Regulating Kinase 4 Promotes Oxidative Stress and Mitochondrial Dysfunction by Activating NF-κB and Inhibiting AMPK Pathways in Porcine Placental Trophoblasts
Source: MDPI journal article supplement (doi:10.3390/biomedicines10010165), 2022-01-13
Supplement: s1 [file s1]

Figure S3

A

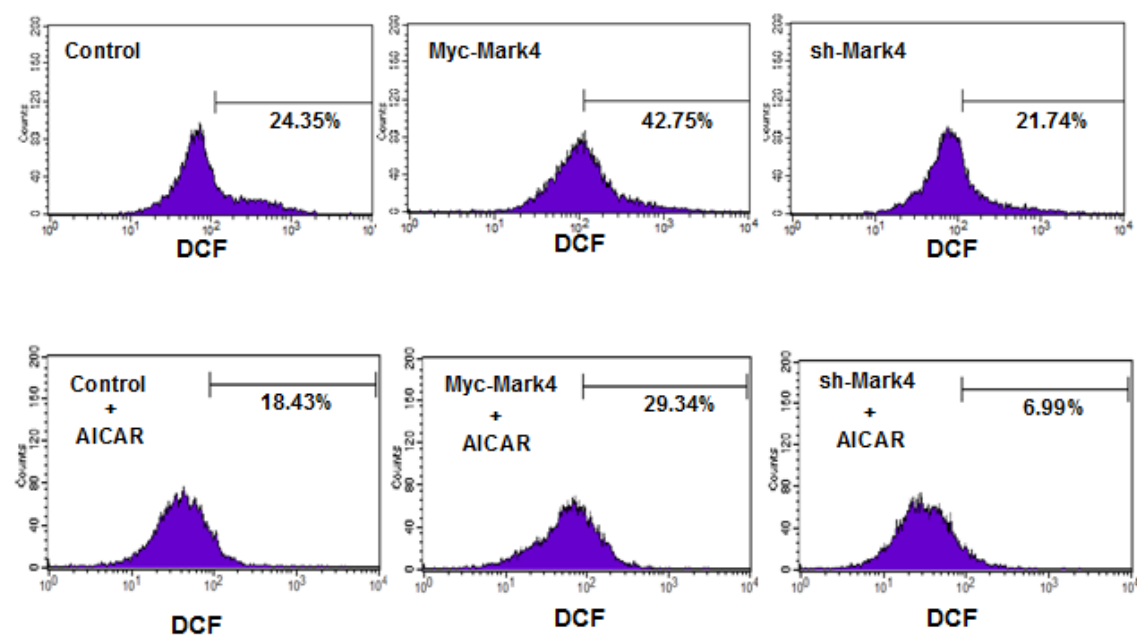

B

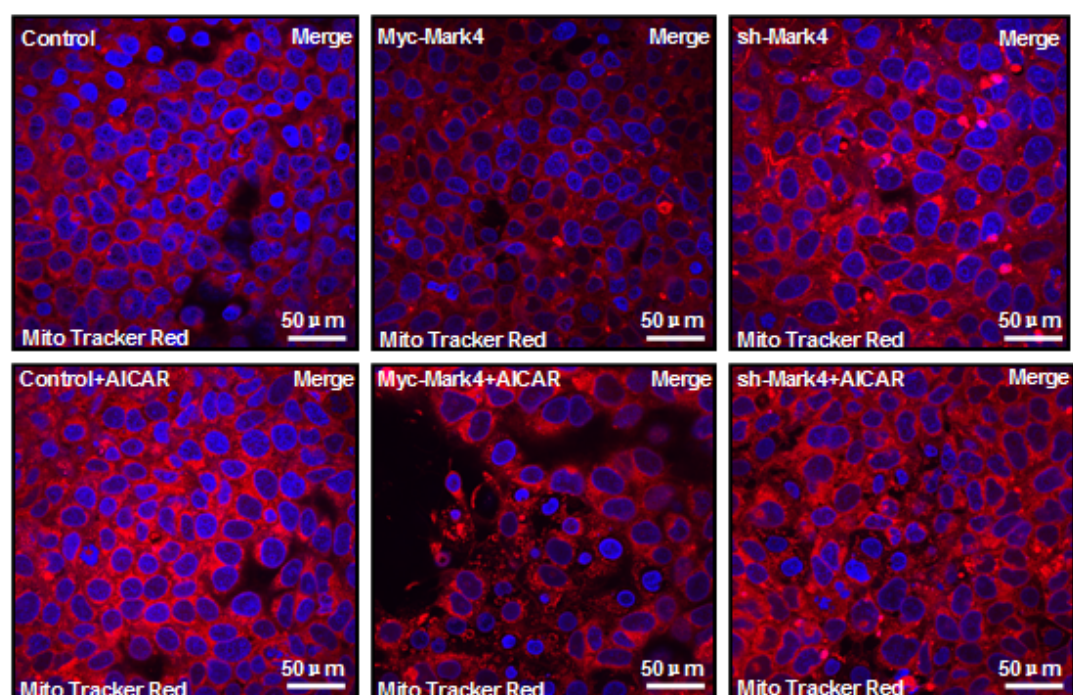

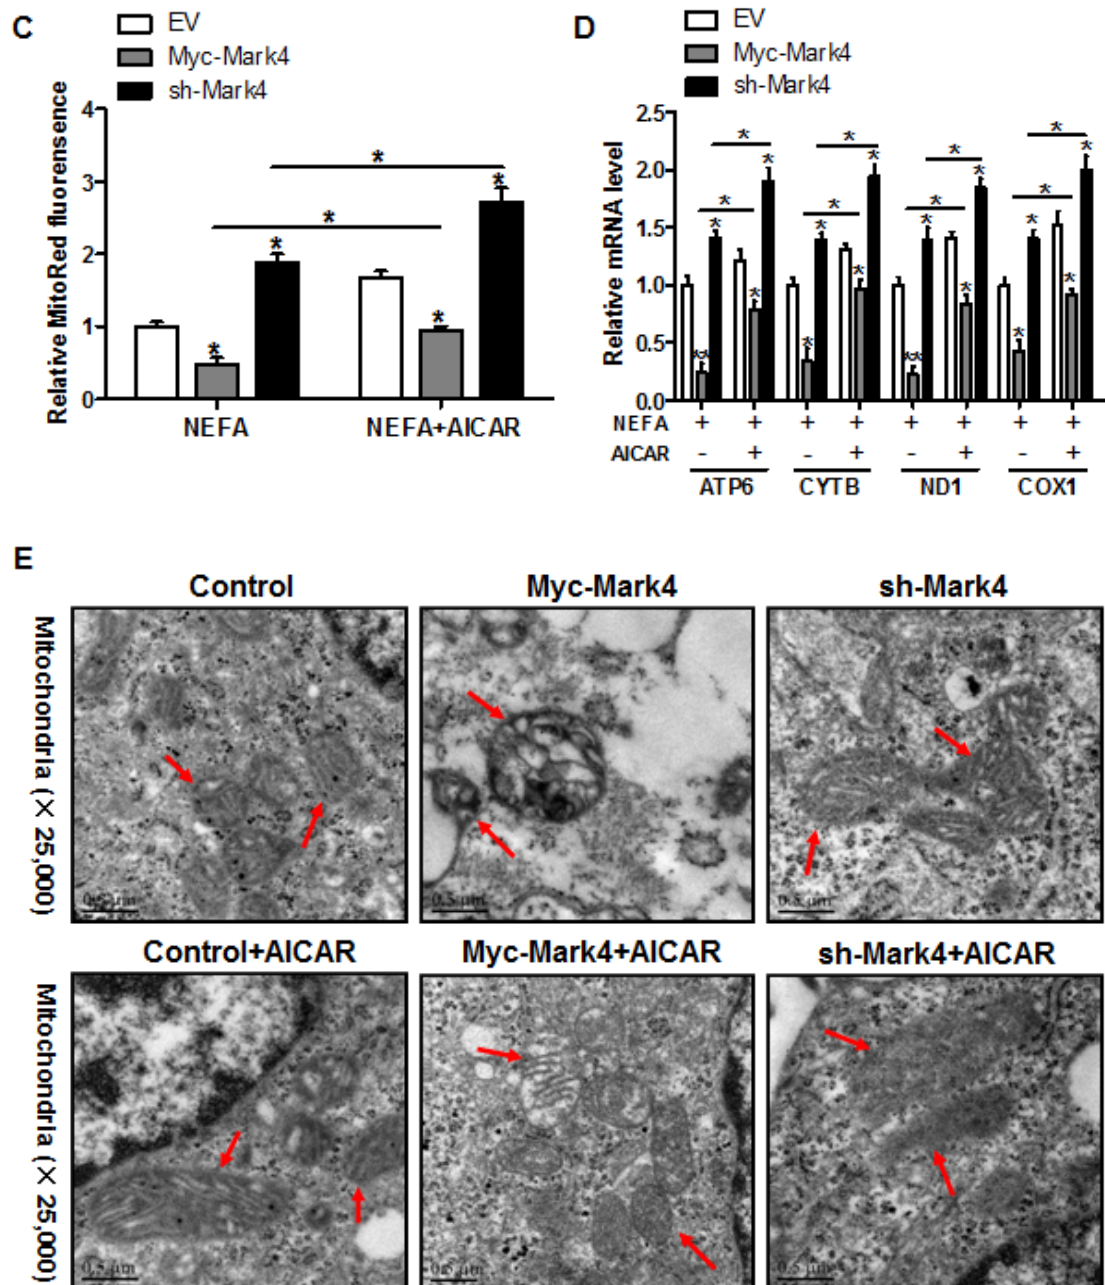

**Figure S3.** AMPK-mediated mitochondrial biogenesis is blocked by MARK4 in pig primary trophoblast cells. (a) ROS generation was measured by DCF production using flow cytometry in pig cytotrophoblasts after transfection with Myc-MARK4 and sh-MARK4 for 48h. Before the assessment, cells were incubated with 400 $\mu$ M NEFA or 1 mM AICAR for 24h ( $n = 3$ ). Value in scale bar depicts the percentage of DCF-positive cells; (b) Mitochondrial biogenesis was estimated by MitoTracker Red staining for mitochondria after transfection with Myc-MARK4 and sh-MARK4 for 48h in cytotrophoblasts. Before staining, cells were incubated with 400 $\mu$ M NEFA or 1 mM AICAR for 24h. Scale bar: 50 $\mu$ m; (c) Quantification of MitoTracker Red staining in (b) by measuring the fluorescence intensity relative to control group (analysis of 10 random microscopic fields per cell section,  $n = 3$ ); (d) mRNA levels of various mitochondria-encoded genes in cytotrophoblasts ( $n = 3$ ); (e) Transmission electronic microscopy images (magnification  $\times 25,000$ ) of mitochondria in cytotrophoblasts after transfection with Myc-MARK4, sh-MARK4 for 48h. Cells were then incubated with 400  $\mu$ M NEFA in the presence or

absence of 1 mM AICAR for 36 h. Values are expressed as mean  $\pm$  SEM. \*\*  $p < 0.01$ ; \*  $p < 0.05$  compared with the control group. NEFA: non-esterified fatty acid; AICAR: AMPK agonist; DCF: dichlorofluorescein; Myc-MARK4 group: over expression of MARK4 group; sh-MARK4 group: knock down of MARK4 group; Control: empty vector (EV) group. Red arrow: mitochondria.
