# Supplementary material for: Microtubule Affinity-Regulating Kinase 4 Promotes Oxidative Stress and Mitochondrial Dysfunction by Activating NF-κB and Inhibiting AMPK Pathways in Porcine Placental Trophoblasts
Source: MDPI journal article supplement (doi:10.3390/biomedicines10010165), 2022-01-13
Supplement: s1 [file s1]

Table S1 Primer sets used for real-time PCR

| Gene name <sup>†</sup> | Productsize (bp) | Direction | Sequence, 5' -/ 3'      |
|------------------------|------------------|-----------|-------------------------|
| UCP2                   | 119              | Forward:  | CACCCAATGTCGCTCGTAATG   |
|                        |                  | Reverse:  | CGTGAAGTGGCAGGGAAGGT    |
| GPx                    | 149              | Forward:  | ATGAGCTTTAGCCGCTGTT     |
|                        |                  | Reverse:  | TCGATGTCCTTGGCTGAGAA    |
| CAT                    | 127              | Forward:  | AACAGTGCCAACGAAGATAA    |
|                        |                  | Reverse:  | GGATGAACAGTTGTGCGTCT    |
| SOD2                   | 129              | Forward:  | TCTGGACAAATCTGAGCCCTAA  |
|                        |                  | Reverse:  | CTTGGACGCCGACGGATACA    |
| ATP6                   | 131              | Forward:  | ATCACTAGCCCACCTTCTAC    |
|                        |                  | Reverse:  | CTGCTGTAATGTTGGCTGTC    |
| ND1                    | 94               | Forward:  | GGCACATCCTCAATCTCCAT    |
|                        |                  | Reverse:  | AGAGGGTAGGGTATTGGTAG    |
| Cyclophilin-A          | 127              | Forward:  | AGGATTTATGTGCCAGGGTG    |
|                        |                  | Reverse:  | CATGGACAAGATGCCAGGAC    |
| PGC-1 $\alpha$         | 126              | Forward:  | CAACAATGAGCCTTCAAACA    |
|                        |                  | Reverse:  | GCATCAAATGAGGGCAATCC    |
| TFAM                   | 122              | Forward:  | AAGCTCAGAACCCAGATGCA    |
|                        |                  | Reverse:  | CACCTGCCAGTCTGCCCTAT    |
| NRF1                   | 82               | Forward:  | GTCCTTTGTATCTCACCTCC    |
|                        |                  | Reverse:  | ACTTACGCACCACATTCTCC    |
| MFN1                   | 132              | Forward:  | CGATGGGCATCATTGTTGTT    |
|                        |                  | Reverse:  | TCTCCTTGGCACGGGTGGTC    |
| COX3                   | 85               | Forward:  | CTCCTCCAAGCCTCAGAATA    |
|                        |                  | Reverse:  | ACCCTGTAGCCACAAAGAAA    |
| CYTB                   | 86               | Forward:  | ATCGGAACAGACCTCGTAGA    |
|                        |                  | Reverse:  | ATAAAGTGGAAGGCGAAGAA    |
| PGC-1 $\beta$          | 113              | Forward:  | TGCCAAAGAAGCACCCAGAGC   |
|                        |                  | Reverse:  | GTCACCAAACGAGCAGGAGAAGG |
| Drp1                   | 100              | Forward:  | TAAACCGAAGCCAGAAGGACA   |
|                        |                  | Reverse:  | AAGTGGCGATAGGAAGGGTG    |
| MFN2                   | 128              | Forward:  | CTGTGGGCTGGAGACTCATCG   |
|                        |                  | Reverse:  | GCTGGCGTACTCTACAACTGG   |
| OPA1                   | 117              | Forward:  | ATGAAATAGAACTCCGAATG    |
|                        |                  | Reverse:  | GTAAGTCAACAAGCACCATC    |
| COX1                   | 100              | Forward:  | GGAGCGGGTACTGGATGAAC    |
|                        |                  | Reverse:  | CTGCAAGGTGTAGGGAGAAA    |
| Mark4                  | 138              | Forward:  | TCCGAGAAGTCCGCATCA      |
|                        |                  | Reverse:  | GCGACACGAGGTAGTCAAACAC  |
| NDUFB8                 | 134              | Forward:  | GGCCTTCATGCTGTTTCAT     |
|                        |                  | Reverse:  | CCACTGGCTCAGGTTCTTT     |
| SDHB                   | 125              | Forward:  | TGTGGTCCTATGGTGTGTTG    |
|                        |                  | Reverse:  | TTGCCTCCGTTGATGTTC      |

| Gene name <sup>†</sup> | Productsized (bp) | Direction | Sequence, 5'-/ 3'         |
|------------------------|-------------------|-----------|---------------------------|
| UQCRC2                 | 135               | Forward:  | ATTCTGGACTCTTCGGGATT      |
|                        |                   | Reverse:  | TGTTCTTGGCAGCTTGGA        |
| ATP5 $\alpha$          | 110               | Forward:  | TGCCACTCAACAACCTCTT       |
|                        |                   | Reverse:  | CACCCGCATAGATAACAG        |
| NOX1                   | 136               | Forward:  | CCCTTTACCCTGACCTCT        |
|                        |                   | Reverse:  | GACCATCCACCTCAATCC        |
| NOX4                   | 99                | Forward:  | TCCGAATGGTCAAAGAAA        |
|                        |                   | Reverse:  | TGAGGGTAAATGGATGGT        |
| POLG1                  | 118               | Forward:  | AGCATCCATGACGAGGTTTCGC    |
|                        |                   | Reverse:  | TCAGACCCAGCTTGTAGGCAAA    |
| POLG2                  | 90                | Forward:  | CTTCAGCAGCAGTGATTGTC      |
|                        |                   | Reverse:  | GTTTCTATTGGCTCCTTTCC      |
| SSBP1                  | 124               | Forward:  | ATACCAAATGGGCGATGTCA      |
|                        |                   | Reverse:  | TTTCCCTTCCACGTAAACTC      |
| GAPDH                  | 233               | Forward:  | CCACAACATACGTAGCACCACGATC |
|                        |                   | Reverse:  | CCTTCATTGACCTCCACTACATGGT |
| HPRT1                  | 131               | Forward:  | TCAAGCAGCATAATCCAAAG      |
|                        |                   | Reverse:  | AAGGGCATAGCCTACCACAA      |

<sup>†</sup>All porcine gene sequences.
